# Supplementary material for: Recurrence of bacteremia and infective endocarditis according to bacterial species of index endocarditis episode
Source: Springer Nature journal article supplement (doi:10.1007/s15010-023-02068-x), 2023-07-03
Supplement: MOESM1 [file 25568198]

**Supplementary Figure 1. Cumulative incidence of recurrent bacteremia (without IE) with the same bacterial species as the primary IE**

**A**

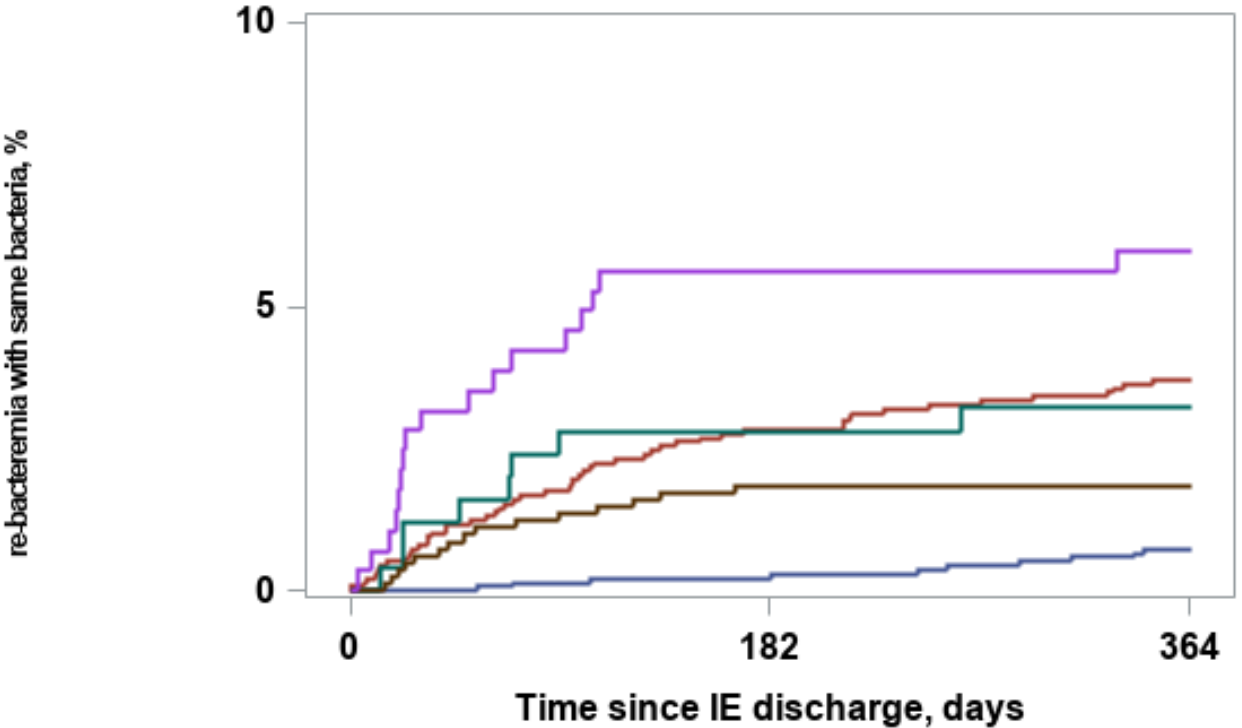

|                       | Patients at risk |      |      |
|-----------------------|------------------|------|------|
|                       | 0                | 182  | 364  |
| Streptococcus         | 1366             | 1215 | 1131 |
| Staphylococcus aureus | 1374             | 1123 | 1021 |
| Other                 | 249              | 203  | 194  |
| Enterococcus          | 813              | 646  | 592  |
| CoNS                  | 284              | 222  | 208  |

**B**

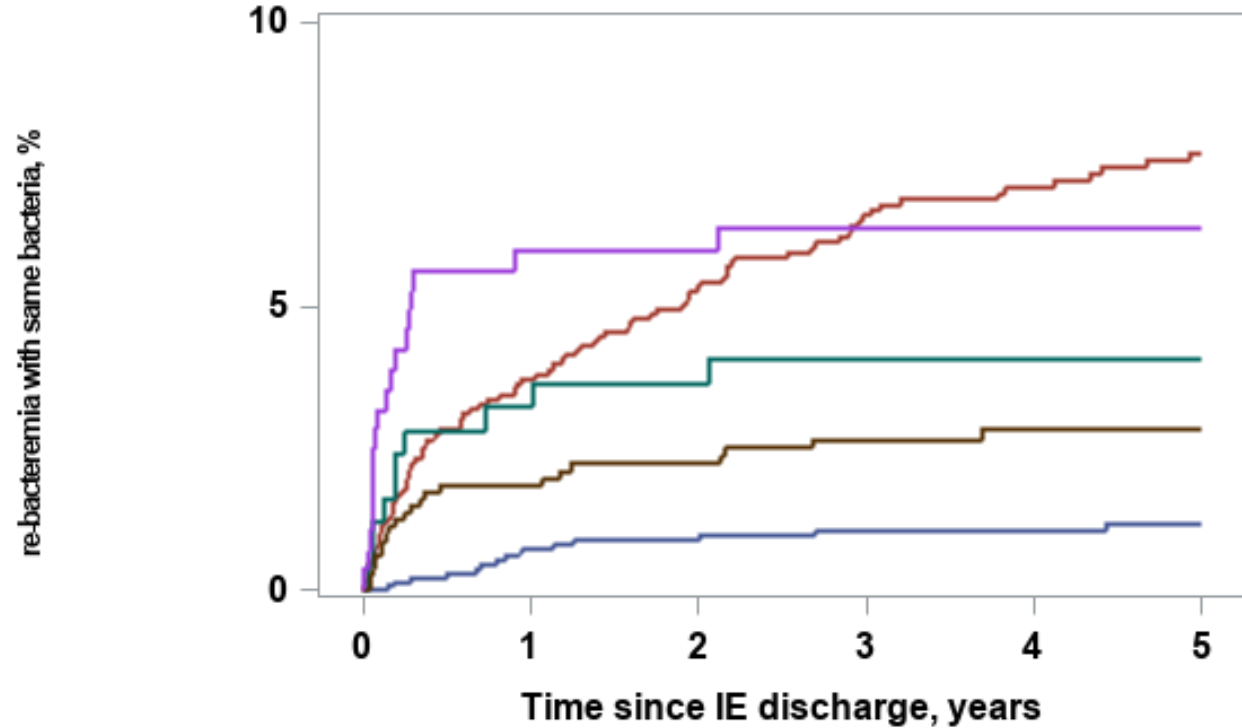

|                       | Patients at risk |      |      |      |     |     |     |     |     |     |     |
|-----------------------|------------------|------|------|------|-----|-----|-----|-----|-----|-----|-----|
|                       | 0                | 1    | 2    | 3    | 4   | 5   | 6   | 7   | 8   | 9   | 10  |
| Streptococcus         | 1366             | 1215 | 1131 | 1023 | 915 | 826 | 731 | 643 | 579 | 500 | 433 |
| Staphylococcus aureus | 1374             | 1123 | 1021 | 891  | 779 | 695 | 602 | 544 | 467 | 409 | 363 |
| Other                 | 249              | 203  | 194  | 174  | 159 | 143 | 120 | 105 | 94  | 80  | 74  |
| Enterococcus          | 813              | 646  | 592  | 517  | 466 | 420 | 370 | 324 | 275 | 224 | 196 |
| CoNS                  | 284              | 222  | 208  | 191  | 171 | 149 | 133 | 115 | 104 | 88  | 84  |

Supplementary Figure 1. The figure shows the cumulative incidence of a recurrent episode of bacteremia (not including IE episodes) with same bacterial species causing the primary episode of IE within 12 months of follow-up, Panel A (left) and a maximum of five years of follow-up, Panel B (right).
