# Supplementary material for: Recurrence of bacteremia and infective endocarditis according to bacterial species of index endocarditis episode
Source: Springer Nature journal article supplement (doi:10.1007/s15010-023-02068-x), 2023-07-03
Supplement: MOESM2 [file 25568198]

**Supplementary Figure 2. Cumulative incidence of recurrent bacteremia with the same bacterial species as the primary IE.**

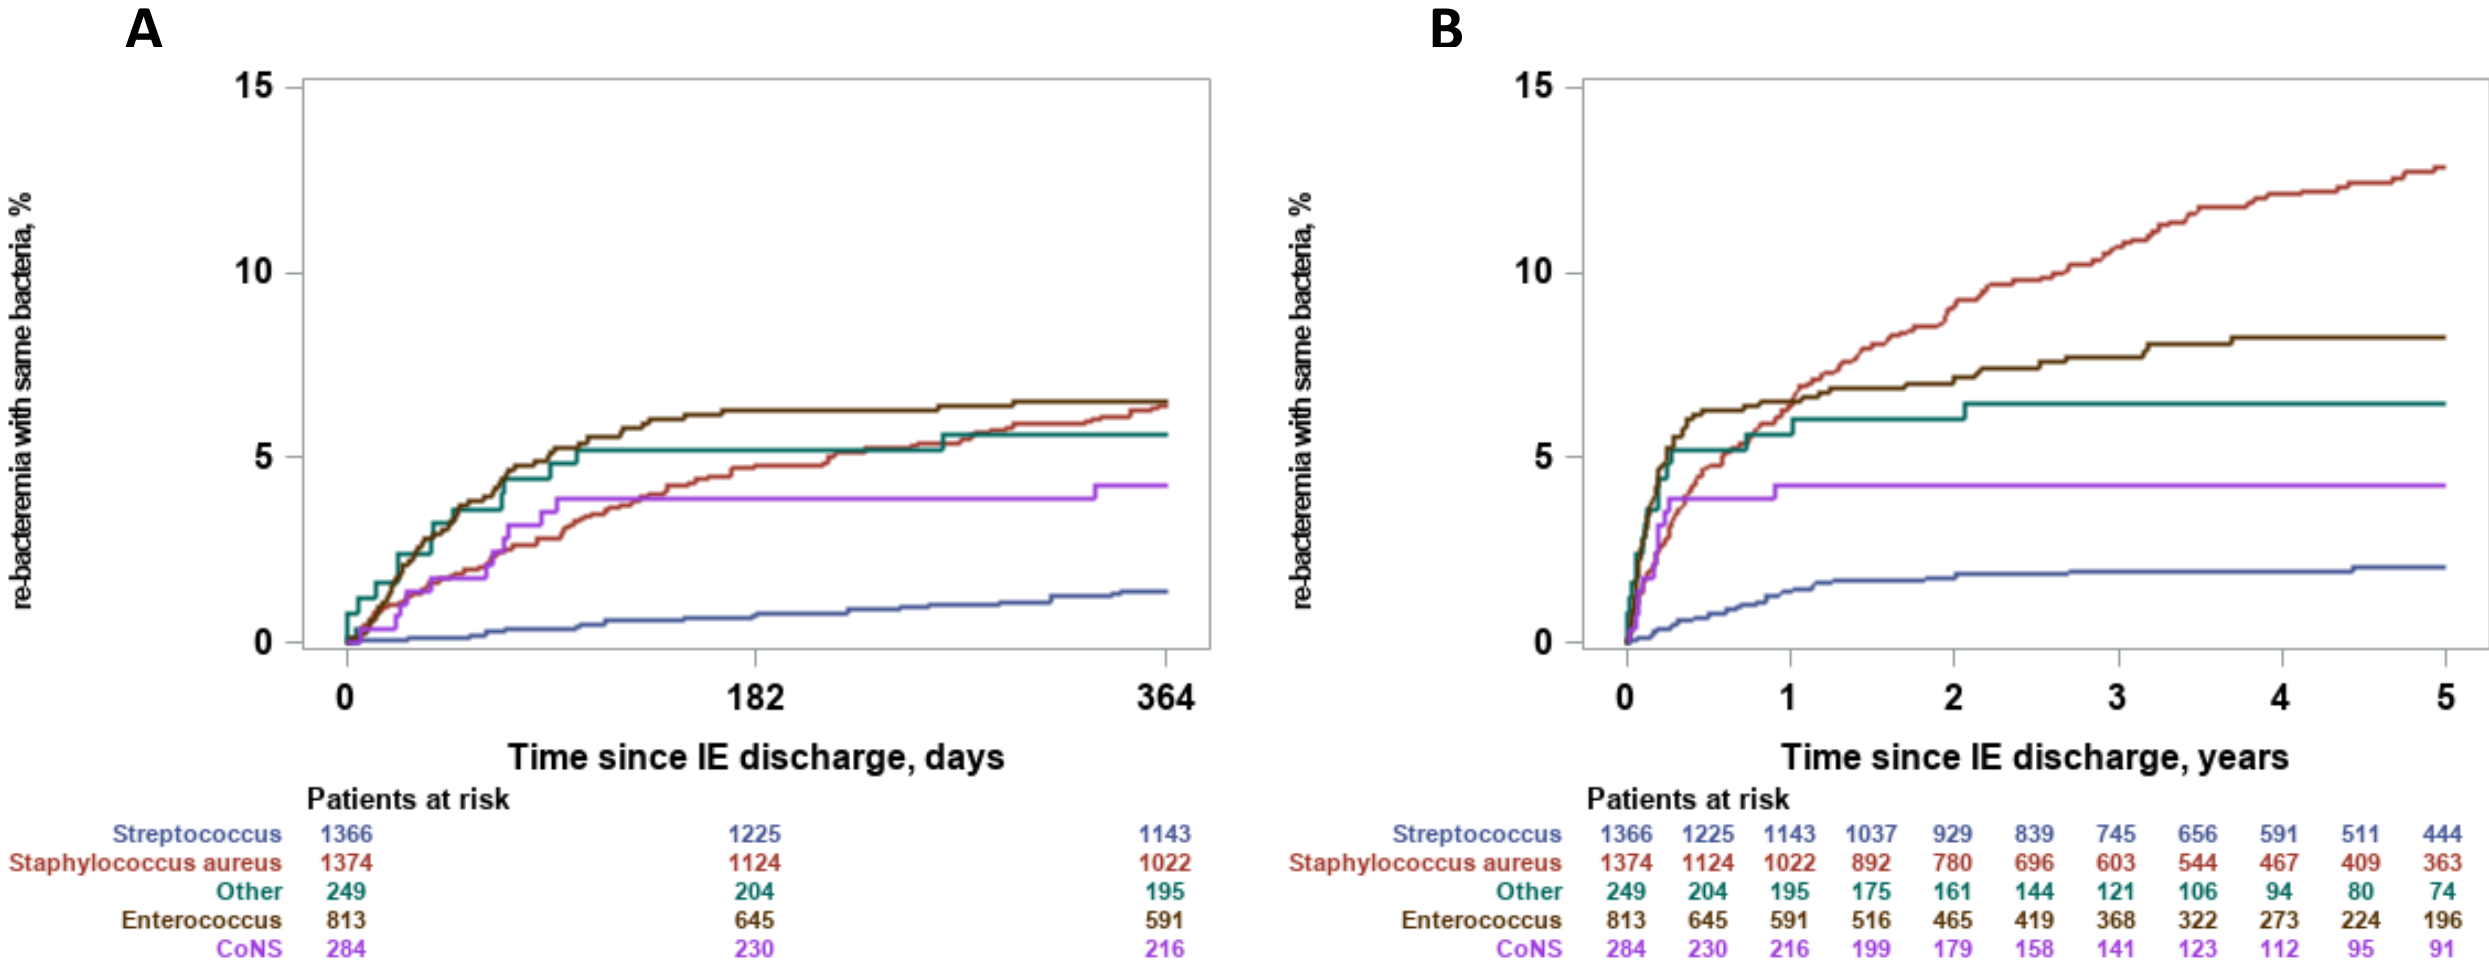

Supplementary Figure 2. The figure shows the cumulative incidence of a recurrent episode of bacteremia with same bacterial species causing the primary episode of IE within 12 months of follow-up, Panel A (left) and a maximum of five years of follow-up, Panel B (right). Recurrence of CoNS bacteremia was defined from two positive blood cultures 24 hours apart within 7 days.
